# Supplementary material
Source: publisher figshare collection journal article supplement (https://acs.figshare.com/ndownloader/files/4211482)
Supplement: Supplementary file 1 [file 4211482]

## Supporting Information

### Biaxially Extended Thiophene–Fused Thiophene Conjugated Copolymers for High Performance Field Effect Transistors

Chih-Jung Lin,<sup>1,+</sup> Wen-Ya Lee,<sup>1,2,+</sup> Chien Lu,<sup>1</sup>

Hsiang-Wei Lin,<sup>2</sup> and Wen-Chang Chen<sup>1,2,\*</sup>

1: Department of Chemical Engineering, National Taiwan University, Taipei 106  
Taiwan

2: Institute of Polymer Science and Engineering, National Taiwan University, Taipei  
106 Taiwan

\* Corresponding author. Wen-Chang Chen, E-mail: chenwc@ntu.edu.tw

+ Equally contribute to the work.

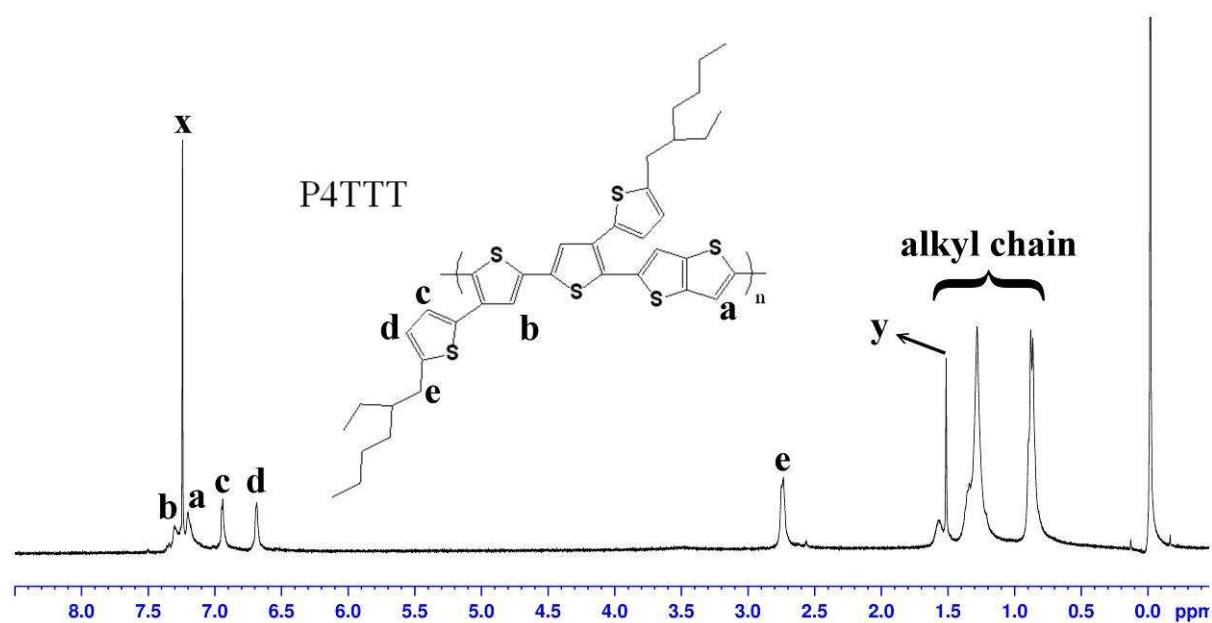

**Figure S1.**  $^1\text{H}$  NMR spectra of **P4TTT** in  $\text{CDCl}_3$ . (x:  $\text{CDCl}_3$ , y:  $\text{H}_2\text{O}$ ).

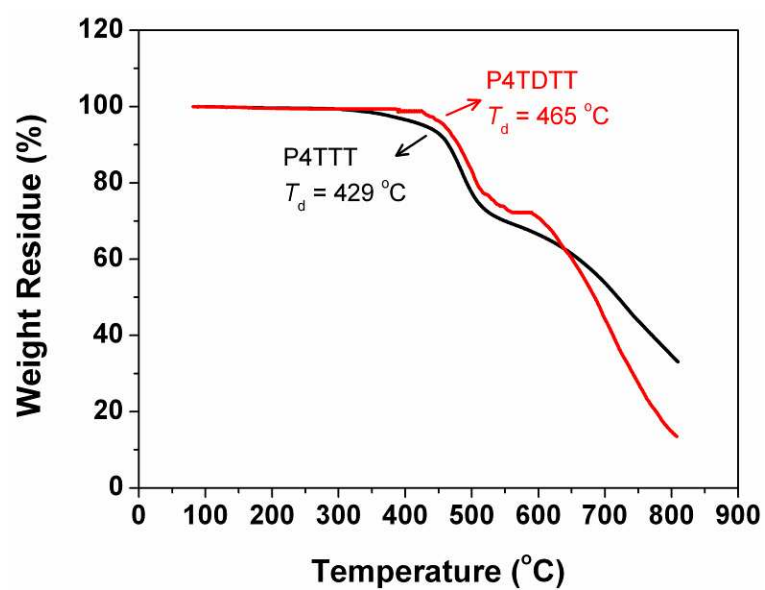

**Figure S2.** TGA curves of **P4TDTT** and **P4TTT** at the heating rate of 10 °C/min under a nitrogen atmosphere.

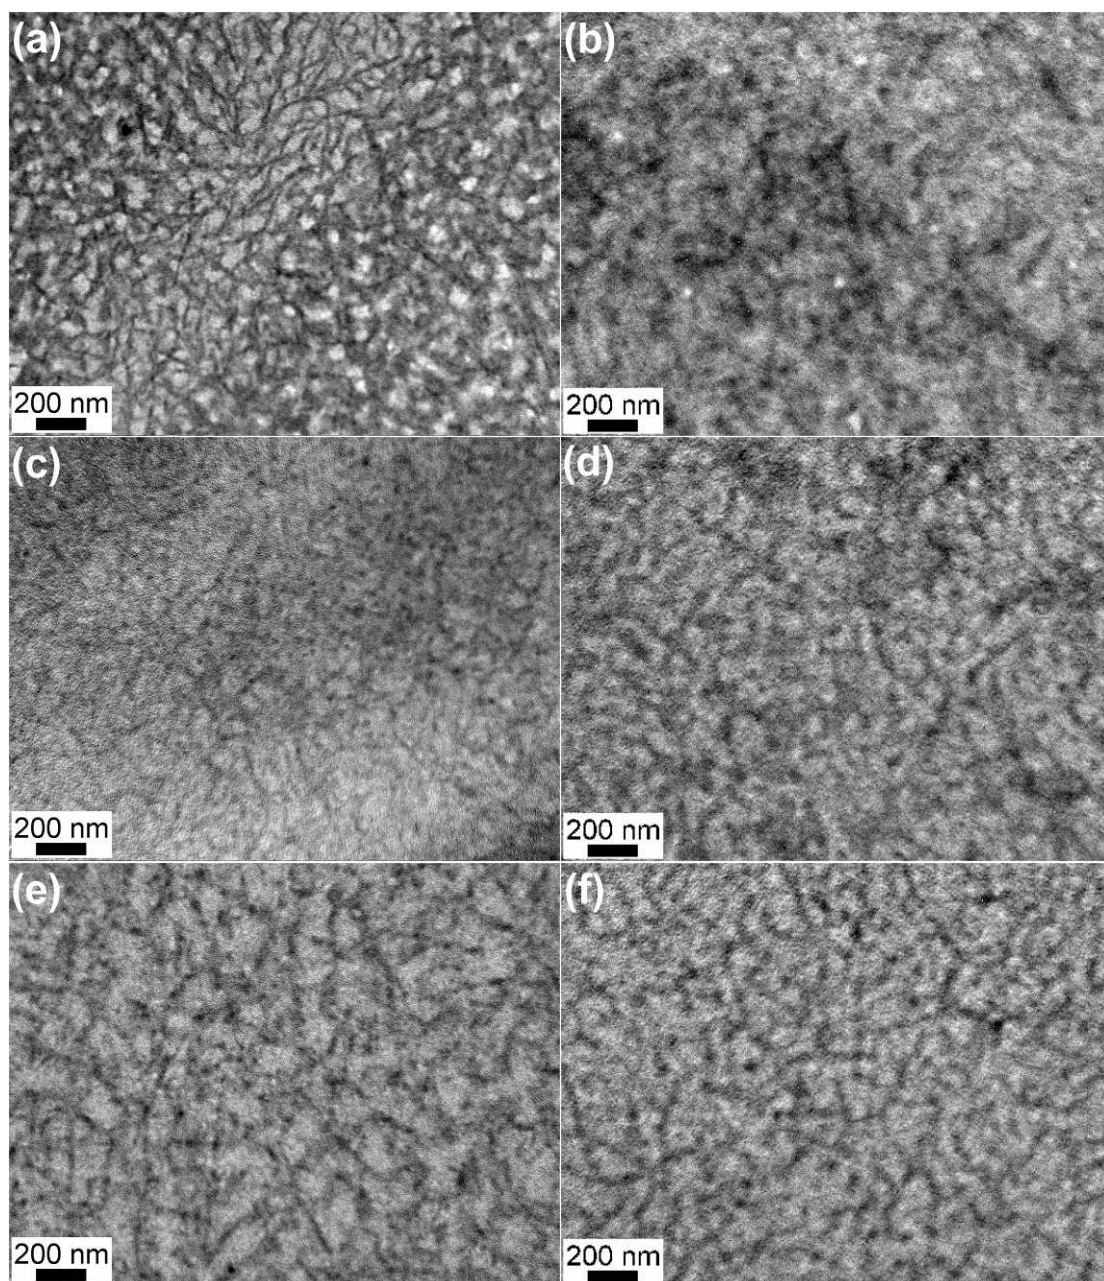

**Figure S3.** TEM images of the thin films of (a,c,e) **P4TDTT** and (b,d,f) **P4TTT** prepared from (a,b) CF, (c,d) CB and (e,f) DCB.

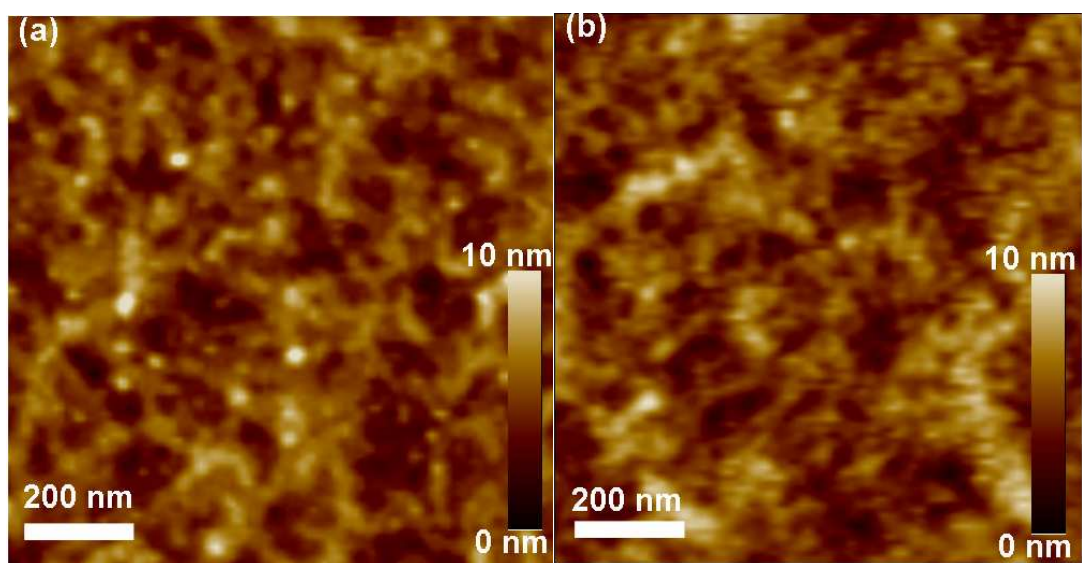

Figure S4. AFM height images of the thin films of (a) **P4TDTT** and (b) **P4TTT** prepared from TCB.
